# Supplementary material for: Implementing Symptom-Based Predictive Models for Early Diagnosis of Pediatric Respiratory Viral Infections
Source: Research Square preprint supplement (doi:10.21203/rs.3.rs-5490724/v1), 2025-01-20
Supplement: Supplementary file 1 [file 7c6aecd707f5abf2e0e898ef.docx]

**Supplementary materials**

| **Table S1. Dataset of demographic characteristics, respiratory viral diagnoses, and symptoms in the study population.** | | | | | | | |
| --- | --- | --- | --- | --- | --- | --- | --- |
| **Variable** | **Adenovirus** | **Flu (A+B)** | **Flu A** | **Flu B** | **Rhinovirus** | **SARS-CoV-2** | **Syncytial Respiratory Virus** |
| **Demographics** |  |  |  |  |  |  |  |
| Age (years), median (IQR) | 3 (5) | 7 (7) | 6 (8) | 7 (6) | 2 (5.5) | 1 (8) | 1 (1.75) |
| Male, n (%) | 73 (57.48%) | 205 (53.25%) | 125 (52.30%) | 82 (54.67%) | 55 (53.40%) | 56 (58.95%) | 75 (48.70%) |
| Female, n (%) | 53 (41.73%) | 177 (45.97%) | 111 (46.44%) | 68 (45.33%) | 48 (46.60%) | 39 (41.05%) | 79 (51.30%) |
| **Symptoms** |  |  |  |  |  |  |  |
| Abdominal pain, n (%) | 17 (13.39%) | 39 (10.13%) | 21 (8.79%) | 18 (12%) | 6 (5.83%) | 4 (4.21%) | 6 (3.90%) |
| Abnormal lung sounds, n (%) | 15 (11.90%) | 29 (7.67%) | 21 (8.90%) | 8 (5.48%) | 30 (29.13%) | 11 (12.22%) | 98 (63.64%) |
| Adenopathies, n (%) | 8 (6.30%) | 34 (8.83%) | 17 (7.11%) | 17 (11.33%) | 2 (1.94%) | 0 (0%) | 3 (1.95%) |
| Apnea, n (%) | 0 (0%) | 0 (0%) | 0 (0%) | 0 (0%) | 0 (0%) | 0 (0%) | 1 (0.67%) |
| Conjunctivitis, n (%) | 29 (22.83%) | 22 (5.71%) | 8 (3.35%) | 14 (9.33%) | 9 (8.74%) | 4 (4.21%) | 13 (8.44%) |
| Cough, n (%) | 95 (74.80%) | 322 (83.64%) | 192 (80.33%) | 134 (89.33%) | 90 (87.38%) | 62 (65.26%) | 148 (96.10%) |
| Crackles, n (%) | 8 (6.35%) | 22 (5.82%) | 16 (6.78%) | 6 (4.11%) | 19 (18.45%) | 7 (7.78%) | 74 (48.05%) |
| Croup, n (%) | 7 (5.51%) | 13 (3.38%) | 8 (3.35%) | 5 (3.33%) | 11 (10.68%) | 3 (3.16%) | 11 (7.14%) |
| Dermatologic symptoms, n (%) | 2 (1.57%) | 9 (2.34%) | 6 (2.51%) | 3 (2%) | 5 (4.85%) | 3 (3.16%) | 2 (1.30%) |
| Diarrhea, n (%) | 14 (11.02%) | 25 (6.49%) | 12 (5.02%) | 13 (8.67%) | 5 (4.85%) | 2 (2.11%) | 12 (7.79%) |
| Fatigue, n (%) | 50 (39.37%) | 233 (60.52%) | 144 (60.25%) | 92 (61.33%) | 30 (29.13%) | 37 (38.95%) | 69 (44.81%) |
| Fever, n (%) | 123 (96.85%) | 382 (99.22%) | 238 (99.58%) | 148 (98.67%) | 78 (75.73%) | 87 (91.58%) | 121 (78.57%) |
| Gastrointestinal symptoms, n (%) | 37 (29.13%) | 79 (20.52%) | 40 (16.74%) | 40 (26.67%) | 14 (13.59%) | 15 (15.79%) | 20 (12.99%) |
| General coinfection, n (%) | 37 (29.13%) | 33 (8.57%) | 14 (5.86%) | 19 (12.67%) | 48 (46.60%) | 23 (24.21%) | 36 (23.38%) |
| Headache, n (%) | 26 (25.24%) | 173 (49.86%) | 101 (47.20%) | 74 (54.41%) | 19 (20.43%) | 18 (25.35%) | 14 (11.86%) |
| Hemorrhages, n (%) | 0 (0%) | 0 (0%) | 0 (0%) | 0 (0%) | 0 (0%) | 0 (0%) | 1 (0.65%) |
| Hepatomegaly, n (%) | 4 (3.15%) | 0 (0%) | 0 (0%) | 0 (0%) | 0 (0%) | 1 (1.05%) | 0 (0%) |
| Highest fever between 37-38ºC, n (%) | 14 (11.38%) | 46 (12.11%) | 31 (13.08%) | 16 (10.88%) | 31 (40.26%) | 33 (38.37%) | 39 (32.50%) |
| Highest fever between 38-39ºC, n (%) | 60 (48.78%) | 239 (62.89%) | 147 (62.03%) | 93 (63.27%) | 37 (48.05%) | 42 (48.84%) | 64 (53.33%) |
| Highest fever over 39ºC, n (%) | 49 (39.84%) | 95 (25%) | 59 (24.89%) | 38 (25.85%) | 9 (11.69%) | 11 (12.79%) | 17 (14.17%) |
| Hypotonia, n (%) | 0 (0%) | 1 (0.26%) | 0 (0%) | 1 (0.67%) | 0 (0%) | 0 (0%) | 0 (0%) |
| Loss of smell, n (%) | 0 (0%) | 0 (0%) | 0 (0%) | 0 (0%) | 2 (2.41%) | 0 (0%) | 1 (1.12%) |
| Loss of taste, n (%) | 1 (1.09%) | 0 (0%) | 0 (0%) | 0 (0%) | 0 (0%) | 0 (0%) | 0 (0%) |
| Nasal congestion, n (%) | 100 (78.74%) | 314 (81.56%) | 187 (78.24%) | 130 (86.67%) | 88 (85.44%) | 69 (72.63%) | 140 (90.91%) |
| Neurological symptoms, n (%) | 0 (0%) | 4 (1.04%) | 3 (1.26%) | 1 (0.67%) | 0 (0%) | 0 (0%) | 2 (1.30%) |
| Nuchal stiffness, n (%) | 0 (0%) | 0 (0%) | 0 (0%) | 0 (0%) | 0 (0%) | 0 (0%) | 0 (0%) |
| Odynophagia, n (%) | 39 (30.71%) | 163 (42.34%) | 104 (43.51%) | 60 (40%) | 26 (25.24%) | 23 (24.21%) | 38 (24.68%) |
| Oral inflammation, n (%) | 0 (0%) | 2 (0.52%) | 2 (0.84%) | 0 (0%) | 0 (0%) | 1 (1.05%) | 0 (0%) |
| Peripheral paralysis, n (%) | 0 (0%) | 0 (0%) | 0 (0%) | 0 (0%) | 0 (0%) | 0 (0%) | 0 (0%) |
| Rash, n (%) | 2 (1.57%) | 6 (1.56%) | 4 (1.67%) | 2 (1.33%) | 5 (4.85%) | 2 (2.11%) | 1 (0.65%) |
| Respiratory distress (mild), n (%) | 7 (100%) | 7 (70%) | 3 (60%) | 4 (80%) | 11 (78.57%) | 3 (60%) | 29 (54.72%) |
| Respiratory distress (moderate), n (%) | 0 (0%) | 3 (30%) | 2 (40%) | 1 (20%) | 3 (21.43%) | 2 (40%) | 20 (37.74%) |
| Respiratory distress (severe), n (%) | 0 (0%) | 0 (0%) | 0 (0%) | 0 (0%) | 0 (0%) | 0 (0%) | 4 (7.55%) |
| Seizures, n (%) | 0 (0%) | 1 (0.26%) | 1 (0.42%) | 0 (0%) | 0 (0%) | 0 (0%) | 1 (0.65%) |
| Shock, n (%) | 0 (0%) | 0 (0%) | 0 (0%) | 0 (0%) | 0 (0%) | 0 (0%) | 0 (0%) |
| Splenomegaly, n (%) | 3 (2.36%) | 0 (0%) | 0 (0%) | 0 (0%) | 0 (0%) | 0 (0%) | 0 (0%) |
| Subset coinfection, n (%) | 32 (25.20%) | 21 (5.45%) | 8 (3.35%) | 13 (8.67%) | 35 (33.98%) | 20 (21.05%) | 31 (20.13%) |
| Tachycardia, n (%) | 3 (2.36%) | 3 (0.78%) | 1 (0.42%) | 2 (1.33%) | 3 (2.91%) | 0 (0%) | 20 (12.99%) |
| Tachypnea, n (%) | 5 (3.94%) | 9 (2.34%) | 6 (2.51%) | 3 (2%) | 4 (3.88%) | 3 (3.16%) | 33 (21.43%) |
| Vomiting, n (%) | 24 (18.9%) | 52 (13.51%) | 30 (12.55%) | 23 (15.33%) | 12 (11.65%) | 14 (14.74%) | 12 (7.79%) |
| Wheezing, n (%) | 9 (7.14%) | 15 (3.97%) | 12 (5.08%) | 3 (2.05%) | 23 (22.33%) | 10 (11.11%) | 73 (47.40%) |

**Figure S1. Percentage of missing values for each symptom.**

**Figure S2. Co-infection correlation among the different respiratory viruses.**

**
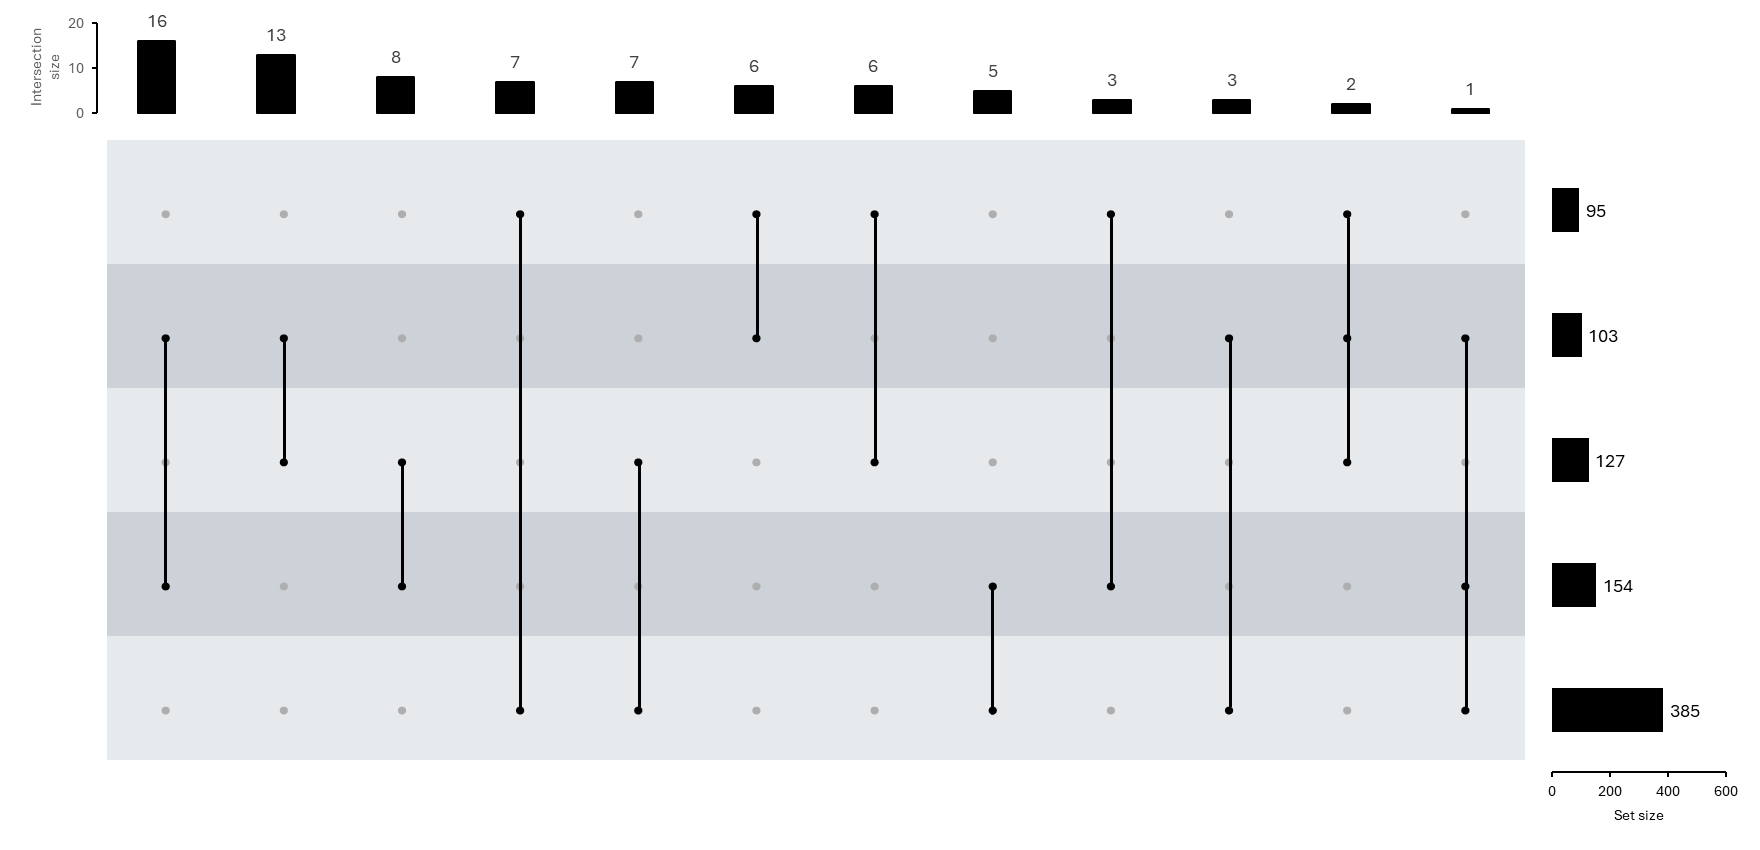
**
